# Supplementary material
Source: publisher figshare collection journal article supplement (https://tandf.figshare.com/articles/dataset/_/6622370)
Supplement: Supplementary file 2 [file 2]

**Figure S2**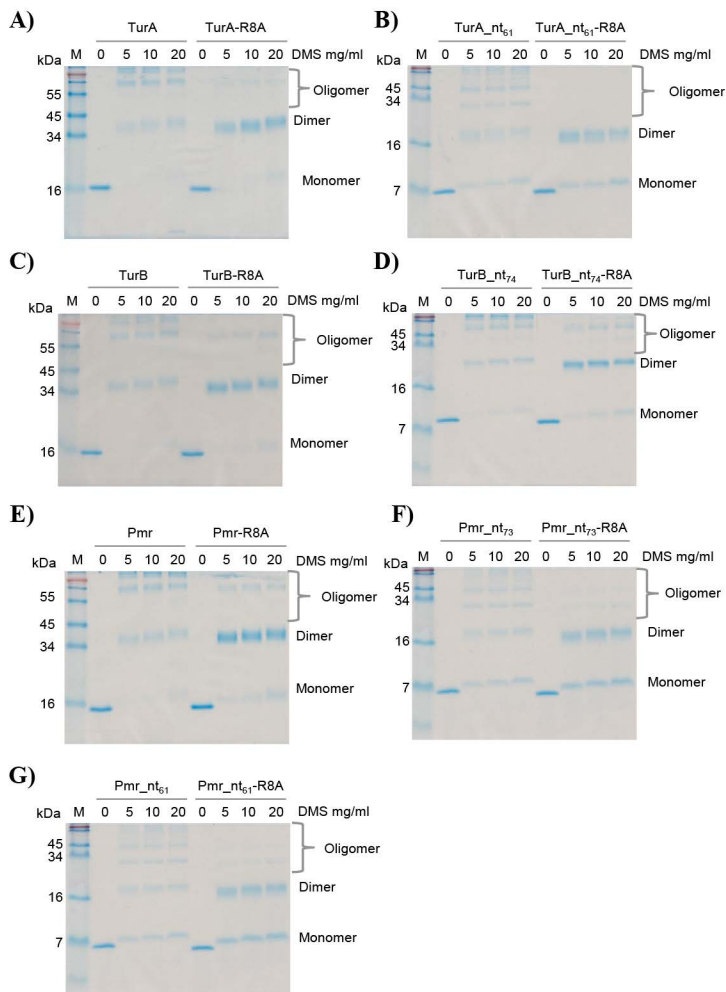

**Figure S2 Homo-oligomerization ability of R8A derivatives of TurA, TurB and Pmr full-length proteins and N-terminal truncated variants.** Tricine-SDS-PAGE profiles of TurA and TurA-R8A (A), TurA<sub>nt61</sub> and TurA<sub>nt61</sub>-R8A (B), TurB and TurB-R8A (C), TurB<sub>nt74</sub> and TurB<sub>nt74</sub>-R8A (D), Pmr and Pmr-R8A (E), Pmr<sub>nt73</sub> and Pmr<sub>nt73</sub>-R8A (F), and Pmr<sub>nt61</sub> and Pmr<sub>nt61</sub>-R8A (G) after chemical cross-linking for 1 hour at room temperature are shown. "M" indicates the protein marker. Numbers above the lanes indicate the concentration of DMS. The final concentration of the protein in the cross-linking reactions was set to 0.14 mg/ml. The bands corresponding to oligomers, dimers, and monomers are shown.
