# Supplementary material
Source: publisher figshare collection journal article supplement (https://tandf.figshare.com/articles/dataset/_/6622370)
Supplement: Supplementary file 3 [file 2]

**Figure S4**

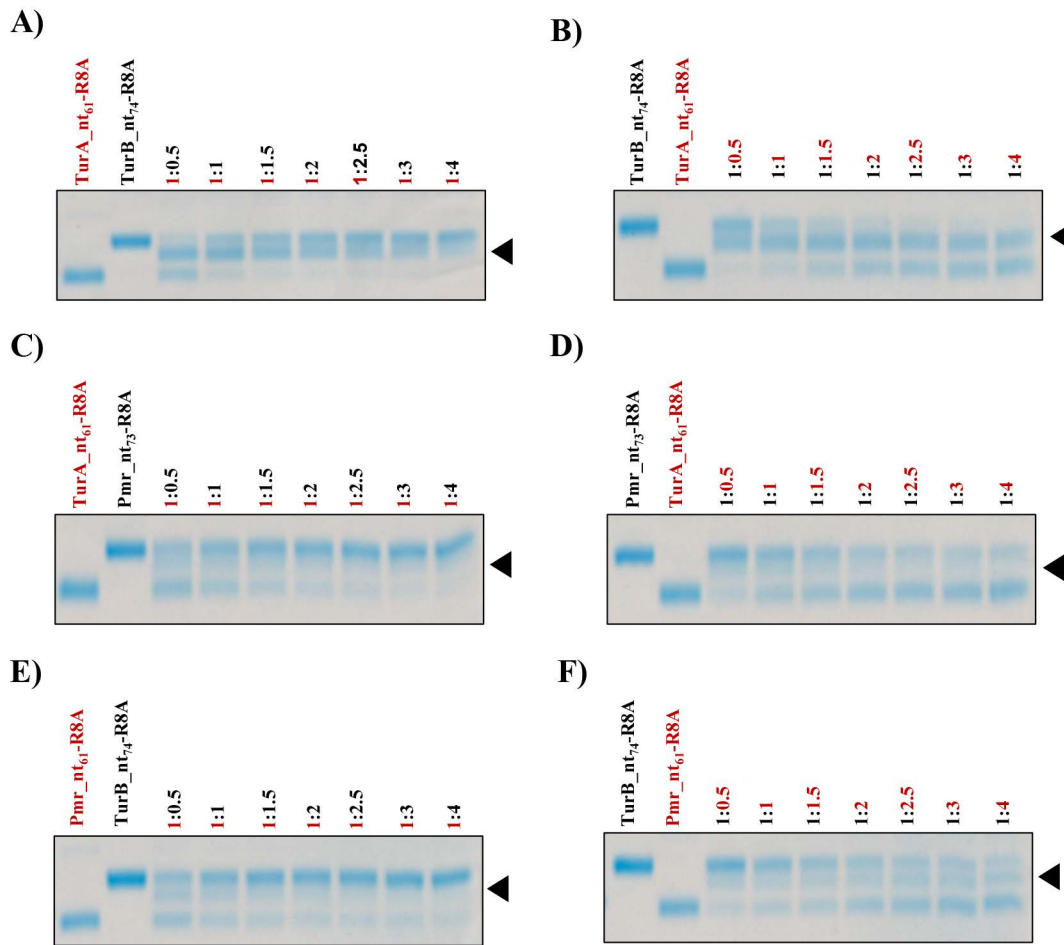

**Figure S4 Analysis of the *in vitro* heteromeric interaction of TurA, TurB and Pmr N-terminal truncated variants inactivated at the terminal dimerization site.** Purified TurA<sub>nt61</sub>-R8A+TurB<sub>nt74</sub>-R8A (A, B), TurA<sub>nt61</sub>-R8A+ Pmr<sub>nt73</sub>-R8A (C, D), and Pmr<sub>nt61</sub>-R8A+TurB<sub>nt74</sub>-R8A (E, F) were incubated with 5 mg/ml DMS for 1 hour at room temperature, followed by resolving on 18% tricine-SDS-PAGE. The bands corresponding to heterodimers are indicated with black arrows. Numbers above the lanes indicate the amount of the protein in the range of 20-40  $\mu$ M used for the analysis. Proteins and the corresponding applied amounts are indicated in the same color.
