# Supplementary material
Source: publisher figshare collection journal article supplement (https://tandf.figshare.com/articles/dataset/_/6622370)
Supplement: Supplementary file 4 [file 2]

**Figure S7**

**TurA+TurB\_nt<sub>50</sub>-R8A (gradient)**

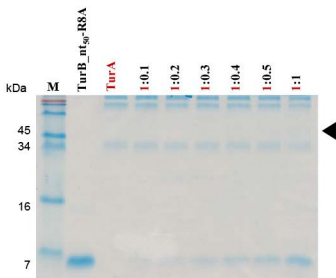

**TurB+TurB\_nt<sub>50</sub>-R8A (gradient)**

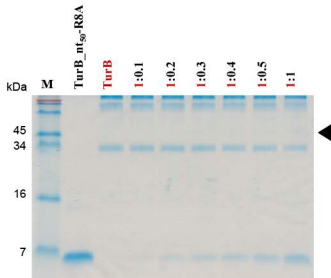

**Pmr+TurB\_nt<sub>50</sub>-R8A (gradient)**

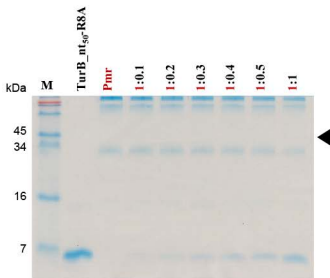

**Figure S7 Analysis of the *in vitro* interaction between TurB\_nt<sub>50</sub>-R8A and full-length TurA, TurB and Pmr.** Chemical cross-linking assays were performed with 5 mg/ml DMS for 1 hour at room temperature, followed by resolving on 18% tricine-SDS-PAGE. The bands corresponding to tetramers are indicated with black arrows. “M” indicates the protein marker. Numbers above the lanes indicate the amount of the protein in the range of 2-20  $\mu$ M used for the analysis. Proteins and the corresponding applied amounts are indicated in the same color.
