# Supplementary material
Source: publisher figshare collection journal article supplement (https://tandf.figshare.com/articles/dataset/_/6622370)
Supplement: Supplementary file 5 [file 2]

**Figure S6**

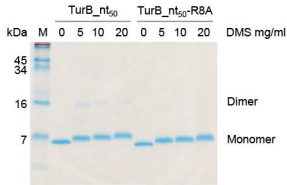

**Figure S6 Effect of R8A amino acid substitution on the homo-dimerization ability of TurB<sub>nt50</sub>.** Tricine-SDS-PAGE profiles of TurB<sub>nt50</sub> and TurB<sub>nt50</sub>-R8A after chemical cross-linking performed for 1 hour at room temperature. “M” indicates the protein marker. Numbers indicate the concentration of DMS. The final concentration of the protein in the cross-linking reactions was set to 0.14 mg/ml. The bands corresponding to dimers and monomers are indicated.
