# Supplementary material
Source: publisher figshare collection journal article supplement (https://tandf.figshare.com/articles/dataset/_/6622370)
Supplement: Supplementary file 6 [file 2]

**Figure S5**

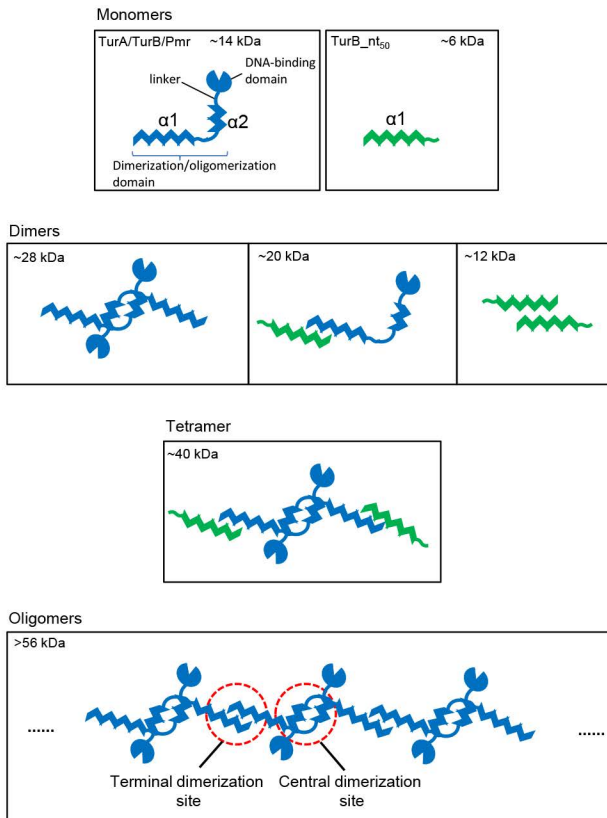

**Figure S5 Model of expected mode of interaction between full-length TurA, TurB or Pmr and TurB\_nt<sub>50</sub> variant inactivated at the central dimerization site.** Dimerization/oligomerization domain, flexible linker and DNA-binding domain in the full-length TurA, TurB and Pmr model are indicated. Secondary structural features of the dimerization/oligomerization domain (helices  $\alpha 1$  and  $\alpha 2$ ) are presented based on the solved structure of TurB\_nt<sub>61</sub>-R8A [21]. Expected dimers, tetramers and oligomers are shown (see also Fig. 2). Central and terminal dimerization sites in the oligomer model are shown.
